# Supplementary material for: Effect of alkaline earth metal chloride additives BCl2 (B = Mg, Ca, Sr and Ba) on the photovoltaic performance of FAPbI3 based perovskite solar cells
Source: Royal Society of Chemistry journal article supplement (doi:10.1039/d0nh00263a), 2020-01-01
Supplement: d0nh00263a1.pdf [file d0nh00263a1.pdf]

## Electronic Supplementary Material (ESI) for Nanoscale Horizons

### Supplementary Material

#### Effect of Alkaline Earth Metal Chloride Additives $\text{BCl}_2$ (B = Mg, Ca, Sr and Ba) on Photovoltaic Performance of $\text{FAPbI}_3$ Based Perovskite Solar Cells

Mei Lyu, Do-Kyoung Lee and Nam-Gyu Park\*

School of Chemical Engineering, Sungkyunkwan University, Suwon 440-746, Korea

\*Corresponding author: E-mail: [npark@skku.edu](mailto:npark@skku.edu)

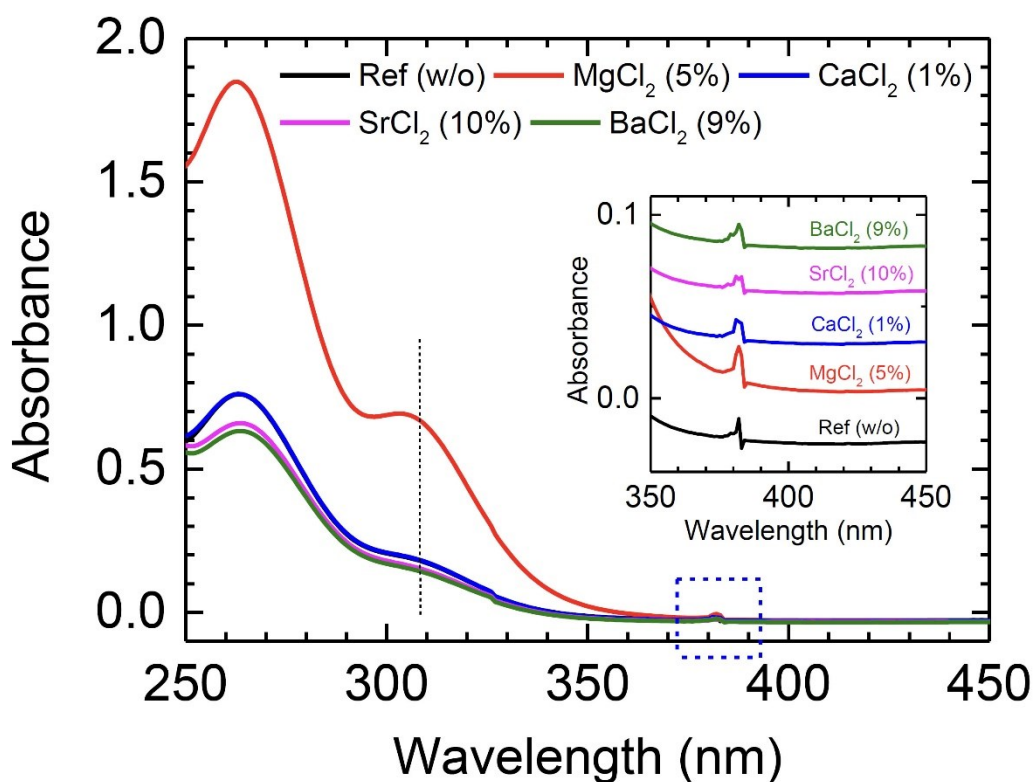

**Fig. S1.** The absorbance of precursor solution with or without  $\text{BCl}_2$  additives. The solution concentration was  $1.4 \times 10^{-4}$  M.

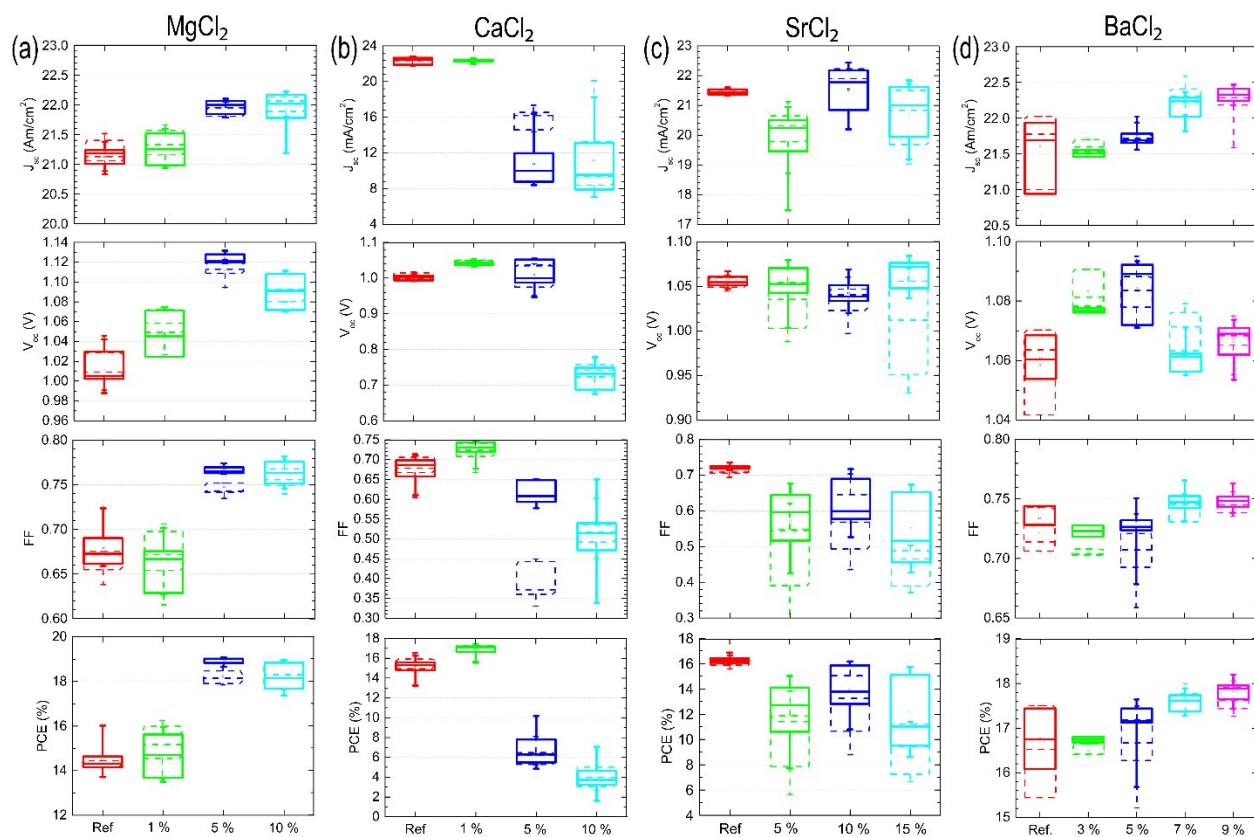

**Fig. S2.** Photovoltaic parameters of  $J_{sc}$ ,  $V_{oc}$ , FF and PCE depending on the concentration of additive of (a)  $MgCl_2$ , (b)  $CaCl_2$ , (c)  $SrCl_2$  and (d)  $BaCl_2$ . Solid boxes and dotted boxes represent the reverse scanned data and the forward scanned data, respectively.

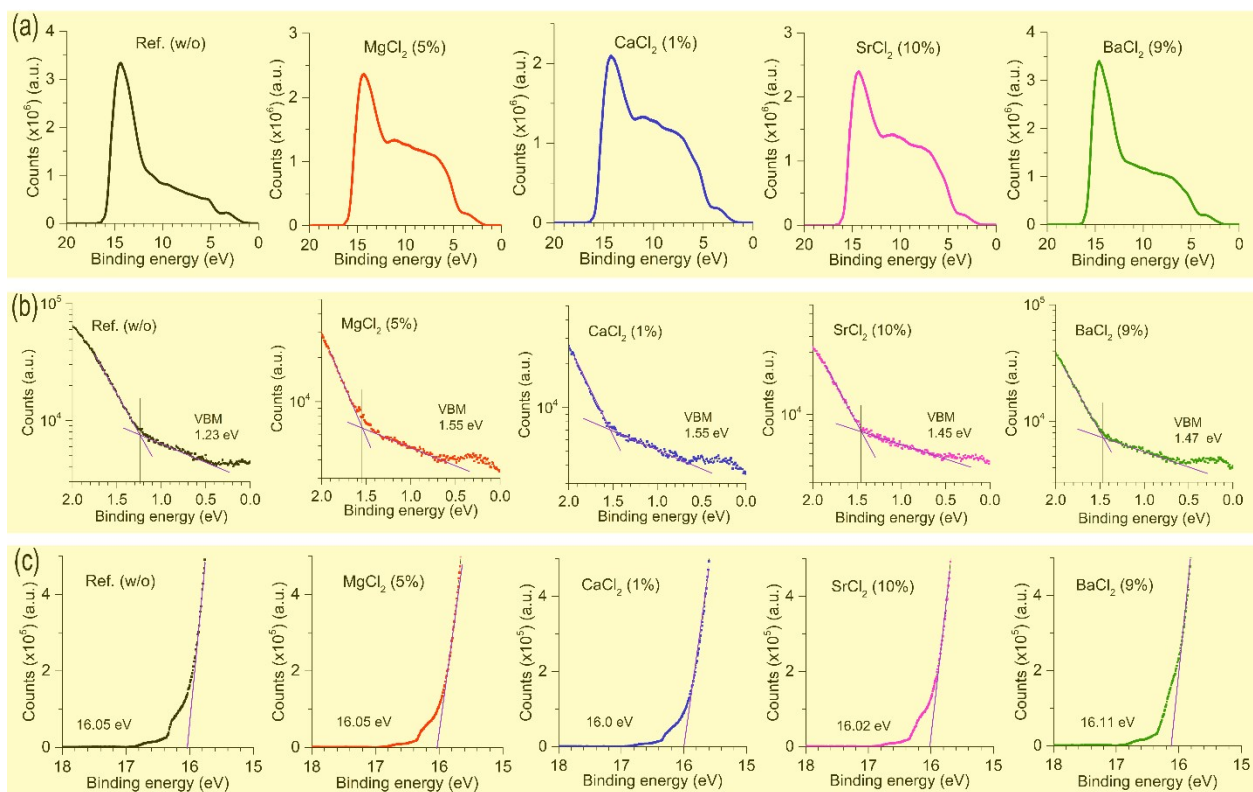

**Fig. S3.** (a) UPS full spectra, (b) logarithmic scale UPS for determining VBM (valence band maximum) and (c)  $E_{\text{cutoff}}$  (cut-off energy) for the pristine FAPbI<sub>3</sub> film (Ref. (w/o)) and those with additives of MgCl<sub>2</sub>, CaCl<sub>2</sub>, SrCl<sub>2</sub> and BaCl<sub>2</sub>.
